# Supplementary material for: Aspergillus fumigatus transcription factor ZfpA regulates hyphal development and alters susceptibility to antifungals and neutrophil killing during infection
Source: PubMed Central journal article supplement (PMC9901008; doi:10.1101/2023.01.25.525624), 2023-01-26
Supplement: NIHPP2023.01.25.525624v1-supplement-1.pdf [file NIHPP2023.01.25.525624v1-supplement-1.pdf]

675 **S1 Fig**

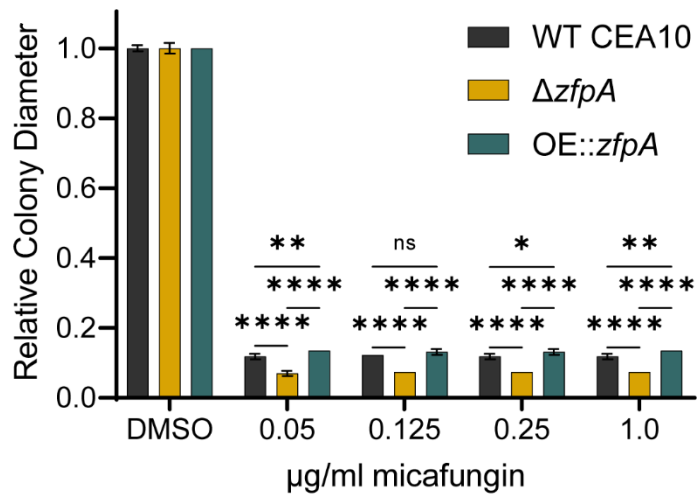

676

677 **S2 Fig**

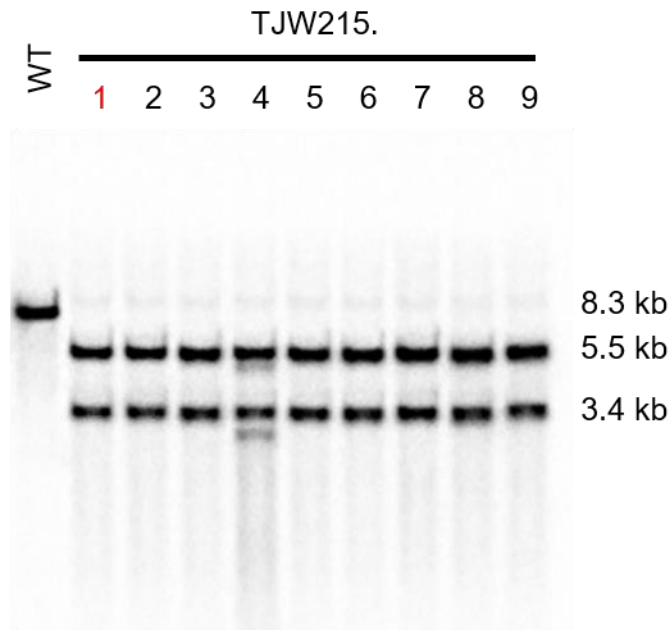

678

679 **S3 Fig**

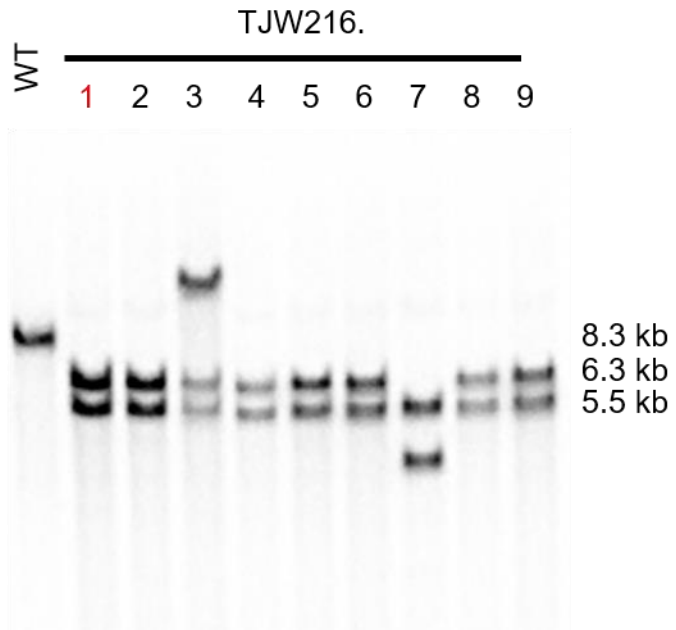

680

681
